# Supplementary material for: Integrative genome-wide expression profiling identifies three distinct molecular subgroups of renal cell carcinoma with different patient outcome
Source: BMC Cancer. 2012 Jul 23;12:310. doi: 10.1186/1471-2407-12-310 (PMC3488567; doi:10.1186/1471-2407-12-310)
Supplement: Additional file 8 Table S5 — List of 36 RCC tumors considered on expression- and SNP array, and their affiliation to a specific group according to gene expression array. [file 1471-2407-12-310-S8.xls]

## Sheet: Sheet1
List of 36 RCC tumors considered on expression- and SNP array, and their affiliation to specific group according to expression array
Genevestigator_ID (expression)	affiliating to group		caseID	Progenetix_ID (SNP)	array GEO/arrayMap ID (SNP)		subtype
RCC_clear cell_S3_BI_rep6	A		G1994.000026_Tu	UZHRCC019	GSM498847		ccRCC
RCC_clear cell_BII_rep5	A		G1999.000175_Tu	UZHRCC030	GSM498850		ccRCC
RCC_clear cell_BII_rep6	A		G2004.000180_Tu	UZHRCC031	GSM498851		ccRCC
RCC_clear cell_BII_rep8	A		G2004.000194_Tu	UZHRCC033	GSM498852		ccRCC
RCC_clear cell_BII_rep9	A		G2004.000384_Tu	UZHRCC034	GSM498853		ccRCC
RCC_clear cell_BII_rep10	A		G2004.000424_Tu	UZHRCC035	GSM498854		ccRCC
RCC_clear cell_BII_rep11	A		G2004.000474_Tu	UZHRCC036	GSM498855		ccRCC
RCC_clear cell_BII_rep15	A		G2004.000734_Tu	UZHRCC040	GSM498856		ccRCC
RCC_clear cell_BII_rep17	A		G2005.000098_Tu	UZHRCC042	GSM498858		ccRCC
RCC_clear cell_BII_rep20	A		G2005.000455_Tu	UZHRCC045	GSM498859		ccRCC
RCC_clear cell_BII_rep21	A		G2005.000568_Tu	UZHRCC046	GSM498860		ccRCC
RCC_clear cell_BII_rep22	A		G2006.000012_Tu	UZHRCC047	GSM498861		ccRCC
RCC_clear cell_BII_rep38	A		G2007.000322_Tu	UZHRCC063	GSM498866		ccRCC
RCC_clear cell_BII_rep39	A		G2007.000439_Tu	UZHRCC064	GSM498867		ccRCC
RCC_clear cell_S1_BII_rep2	A		G2002.000351_Tu	UZHRCC069	GSM498869		ccRCC
RCC_clear cell_S1_BII_rep3	A		G2003.000034_Tu	UZHRCC070	GSM498870		ccRCC
RCC_clear cell_S1_BII_rep4	A		G2003.000214_Tu	UZHRCC071	GSM498871		ccRCC
RCC_clear cell_S1_BII_rep5	A		G2003.000310_Tu	UZHRCC072	GSM498872		ccRCC
RCC_clear cell_S2_BII_rep3	A		G2002.000362_Tu	UZHRCC079	GSM498875		ccRCC
RCC_clear cell_S3_BII_rep4	A		G2000.000340_Tu	UZHRCC096	GSM498879		ccRCC
RCC_clear cell_BI_rep1	B		G1994.000137_Tu	UZHRCC006	GSM498842		ccRCC
RCC_clear cell_BII_rep3	B		G1994.000336_Tu	UZHRCC028	GSM498849		ccRCC
RCC_clear cell_S2_BII_rep1	B		G1994.000561_Tu	UZHRCC073	GSM498873		chromoph. RCC
RCC_clear cell_S1_BI_rep1	C		G1998.000349_Tu	UZHRCC009	GSM498843		ccRCC
RCC_clear cell_S3_BI_rep3	C		G2002.000135_Tu	UZHRCC016	GSM498845		ccRCC
RCC_clear cell_S3_BI_rep4	C		G2002.000293_Tu	UZHRCC017	GSM498846		ccRCC
RCC_clear cell_S4_BI_rep1	C		G1999.000066_Tu	UZHRCC020	GSM498848		ccRCC
RCC_clear_cell_BII_rep25	C		G2006.000089_Tu	UZHRCC050	GSM498862		ccRCC
RCC_clear cell_BII_rep41	C		G2007.000710_Tu	UZHRCC066	GSM498868		ccRCC
RCC_papillary_BI_rep3	C		G2002.000099_Tu	UZHRCC087	GSM498876		papRCC
RCC_papillary_S1_BI_rep1	C		G2003.000436_Tu	UZHRCC092	GSM498877		papRCC
RCC_papillary_S2_BI_rep2	C		G1999.000145_Tu	UZHRCC095	GSM498878		papRCC
RCC_papillary_S4_BI_rep1	C		G2002.000156_Tu	UZHRCC096	GSM498879		papRCC
RCC_papillary_BII_rep1	C		G2005.000467_Tu	UZHRCC098	GSM498880		papRCC
RCC_papillary_BII_rep2	C		G2006.000132_Tu	UZHRCC099	GSM498881		papRCC
RCC_papillary_BII_rep3	C		G2006.000407_Tu	UZHRCC100	GSM498882		papRCC
