# Supplementary material for: Integrative genome-wide expression profiling identifies three distinct molecular subgroups of renal cell carcinoma with different patient outcome
Source: BMC Cancer. 2012 Jul 23;12:310. doi: 10.1186/1471-2407-12-310 (PMC3488567; doi:10.1186/1471-2407-12-310)
Supplement: Additional file 12 Table S8 — Cox proportional hazard regression analysis for survival. [file 1471-2407-12-310-S12.xls]

## Sheet: Tabelle1
Cox proportional hazard regression analysis for survival
Variables	Univariate			Multivariate
	95% CI	RR	P	95% CI	RR	P
Grade 1/2/3	1.85-3.07	2.38	<.0001	1.03-2.08	1.46	0.033
Stage pT1/2 vs. pT3/4	2.60-5.55	3.8	<.0001	1.57-4.64	2.7	<.0001
Group A, B, C	1.49-2.82	2.05	<.0001	1.09-2.20	1.55	0.013
CI = Confidence interval; RR = Relative risk
